# Supplementary material for: Emerging investigator series: identification and transformation of per/polyfluoroalkyl substances (PFASs) in residential wastewater and effluent from alternative treatment systems
Source: Royal Society of Chemistry journal article supplement (doi:10.1039/d5em00134j), 2025-01-01
Supplement: d5em00134j1.xlsx [file d5em00134j1.xlsx]

## Sheet: Content
Supplemental information for: Identification and transformation of per/polyfluoroalkyl substances (PFASs) in residential wastewater and effluent from alternative treatment systems
Table S1: Calibration curve statistics, detection limits, and LOQs of 26 target PFASs
Table S2: QTOF Acquisition Parameters
Table S3: Raw values of all grab samples for target PFASs. Light gray values are <LOQ. Dark gray values are < DL or NA (not measured).
Table S4: All suspect, nontarget and target identifications sorted by homologous series. SS = identified by suspect screening, NTA = identified via Fluoromatch IM, Target = target compound that was identified in samples, T = target compound that was not identified in samples.
Table S5: Concentrations (ng/L) for all compounds across grab samples
Table S6: Concentrations of detected PFASs in mPEs (ng/sampler). Light gray fill represents concentrations <LOQ. Dark gray fill represents concentrations <DL. "<" Denotes compound with censor rate >50%.
Table S7: PFAS identifications via suspect screening detected in all 3 influent and/or effluent replicate injections
Table S8: FluoroMatch Results

## Sheet: Table S1
Table S1: Calibration curve statistics, detection limits, and LOQs of 26 target PFASs
			Grab samples (June)		Grab samples (FALL)		Site 3 Grab Series		Grab Sample Matrix Spike Recoveries (%)			mPEs		Lab blanks (ng/L)
		ISTD	N	LOQ	N	LOQ	N	LOQ	(N=6)*			N	LOQ
Acronym	Full name			ng/L		ng/L		ng/L	Avg	±	StDev		ng/sampler	Avg	±	StDev
PFBA	perfluorobutanoic acid	13C4-PFBA	5	15.9004	10	15.9004	8	16.0742	1.00219	±	0.138408	10	0.0255311	2.012	±	0.7092
PFPeA	perfluoropentanoic acid	13C5-PFPeA	4	50	9	5	10	1.69633	0.771867	±	0.402822	8	0.15	ND
PFHxA	perfluorohexanoic acid	13C5-PFHxA	10	3.89064	9	3.89064	8	11.5037	0.976529	±	0.14296	9	0.0849984	ND
PFHpA	perfluoroheptanoic acid	13C4-PFHpA	4	50	10	1	8	5	1.08843	±	0.0994775	10	0.0290649	ND
PFOA	perfluorooctanoic acid	13C8-PFOA	10	13.8697	9	13.8697	9	2	1.08051	±	0.0872855	9	0.03	0.254	±	0.7096
PFNA	perfluorononanoic acid	13C9-PFNA	9	5	8	2.89043	9	3.32253	1.03537	±	0.0878685	10	0.022012	ND
PFDA	perfluorodecanoic acid	13C6-PFDA	9	63.1617	10	63.1617	9	125.017	0.993168	±	0.072133	9	0.147798	ND
PFUdA	perfluoroundecanoic acid	13C7-PFUdA	4	1	10	1	9	2	0.841283	±	0.115091	9	0.03	ND
PFDoA	perfluorododecanoic acid	13C2-PFDoA	5	100	8	1	6	1	0.987141	±	0.21576	10	0.02	ND
PFTrDA	perfluorotridecanoic acid	13C2-PFDoA	NA	1	6	1	8	22.0842	0.821557	±	0.724292	10	0.02	ND
PFTeDA	perfluorotretradecanoic acid	13C2PFTeDA	NA	2	8	2	8	19.5018	0.941779	±	0.108709	10	0.02	ND
PFBS	perfluorobutane sulfonic acid	13C3-PFBS	9	10	8	0.88	8	0.88	0.99	±	0.06	10	0.0276374	5	±	0.1713
PFPeS	perfluoropentane sulfonic acid	13C3-PFBS	10	2	8	0.94	8	0.94	0.82	±	0.37	10	0.015	ND
br-PFHxS	branched perfluorohexane sulfonic acid	13C3-PFHxS	NA		5	0.86	7	0.86	0.68	±	0.01	10	0.015		NA
L-PFHxS	linear perfluorohexane sulfonic acid	13C3-PFHxS	10	0.74	8	0.74	8	4.77052	1.18	±	0.2	10	0.75	5.715	±	0.3266
PFHpS	perfluoroheptane sulfonic acid	13C8-PFOS	10	2	9	0.96	8	13.2167	1.08	±	0.14	10	0.015	ND
br-PFOS	branced perfluorooctane sulfonic acid	13C8-PFOS	NA		7	1.96	6	38.1777	0.86	±	0.03	10	0.189112		NA
PFOS	perfluorooctane sulfonic acid	13C8-PFOS	10	0.74	9	0.74	8	282.111	1.17	±	0.24	10	0.75	ND
PFNS	perfluorononane sulfonic acid	13C8-PFOS	6	2	9	0.96	8	0.96	1.06	±	0.17	10	0.015	ND
PFDS	perfluorodecane sulfonic acid	13C8-PFOS	3	50	8	0.96	8	1.94	1.07	±	0.35	9	0.03	ND
PFUdS	perfluoroundecane sulfonic acid	13C8-PFOS	NA		10	1	8	1	0.78	±	0.09	NA		ND
PFDoS	perfluorododecane sulfonic acid	13C8-PFOS	NA		9	1	10	1.94	1.35	±	0.85	9	0.03	0.086	±	1.4142
4:2 FTS	4:2 fluorotelomer sulfonic acid	13C2-4:2FTS	8	1.88	6	1.88	7	1.88	1.04	±	0.089724	10	0.015	ND
6:2 FTS	6:2 fluorotelomer sulfonic acid	13C2-6:2FTS	6	1.9	6	1.9	8	70.3433	1.04954	±	0.106472	10	50.1825	ND
8:2 FTS	8:2 fluorotelomer sulfonic acid	13C2-8:2FTS	9	10	5	1.9	7	0.96	1.05391	±	0.0858734	10	0.015	ND
10:2FTS	10:2 fluorotelomer sulfonic acid	13C2-8:2FTS	NA		7	1	7	0.96	0.923403	±	0.480726	NA		ND
									*N=3 for br-PFHxS, br-PFOS, and PFUdS

## Sheet: Table S2
Table S2: QTOF Acquisition Parameters
	All Ions	DDA	IMS
Vcap (V)	2500	2500	2500
Nozzle Voltage (V)	0	0	0
Fragmentor	400	400	400
Collision Energy (V)	0;15;35	0;15;35	0
Isolation width (amu)	N/A	4	N/A
Trap fill time (μs)	N/A	N/A	3900
Trap release time (μs)	N/A	N/A	150
Min range (m/z)	50	100	55
Max range (m/z)	1700	1700	1700

## Sheet: Table S3
Table S3: Raw values of all grab samples for target PFASs. Light gray values are <LOQ. Dark gray values are < DL or NA (not measured).
	location	type	PFBA	PFPeA	PFHxA	PFHpA	PFOA	PFNA	PFDA	PFUdA	PFDoA	PFTrDA	PFTeDA	PFBS	PFPeS	br-PFHxS	L-PFHxS	PFHpS	br-PFOS	L-PFOS	PFNS	PFDS	PFUdS	PFDoS	4:2 FTS	6:2 FTS	8:2 FTS	10:2FTS
summer	SITE 1	INF	38.6	<DL	12.96	<DL	0.76	<DL	<DL	<DL	<DL	<DL	<DL	<DL	<DL	NA	0.04	<DL	NA	<DL	<DL	<DL	NA	<DL	<DL	1002.9	<DL	<DL
		EFF	367.38	25.22	33.28	15.34	12.2	<DL	<DL	<DL	<DL	<DL	<DL	30.3	<DL	NA	13.7	<DL	NA	4.28	<DL	<DL	NA	<DL	<DL	337.74	<DL	<DL
	SITE 3	INF	8449.3	89.26	78.36	34.64	65.2	8.82	<DL	<DL	<DL	<DL	<DL	845.14	<DL	NA	134.86	<DL	NA	30.48	<DL	<DL	NA	<DL	<DL	<DL	59.34	<DL
		EFF	1771.12	<DL	48.66	18.24	46.42	8.54	<DL	<DL	<DL	<DL	<DL	172.52	<DL	NA	11.3	<DL	NA	20.48	<DL	<DL	NA	<DL	<DL	452.8	18.38	<DL
	SITE 4	INF	33.72	<DL	17.44	<DL	<DL	<DL	<DL	<DL	<DL	<DL	<DL	<DL	<DL	NA	<DL	<DL	NA	<DL	<DL	<DL	NA	<DL	<DL	1236.08	<DL	<DL
		EFF	301.7	88.7	96.44	14	18.58	<DL	<DL	<DL	<DL	<DL	<DL	57.5	<DL	NA	4.68	<DL	NA	10.86	<DL	<DL	NA	<DL	<DL	<DL	<DL	<DL
	SITE 5	INF	162.58	45.72	35.68	155.82	9.92	<DL	<DL	<DL	<DL	<DL	<DL	36.12	<DL	NA	8.36	<DL	NA	5.38	<DL	<DL	NA	<DL	<DL	3631.54	<DL	0.04
		EFF	17.38	11.32	21.72	10.86	4.46	<DL	<DL	<DL	<DL	<DL	<DL	1.9	<DL	NA	1.34	<DL	NA	0.74	<DL	<DL	NA	<DL	<DL	1002.06	<DL	<DL
	SITE 6	INF	29.1	<DL	<DL	23.74	0.66	<DL	<DL	<DL	<DL	<DL	<DL	<DL	<DL	NA	<DL	<DL	NA	<DL	<DL	<DL	NA	<DL	<DL	312.58	<DL	<DL
		EFF	236.76	89.2	53.46	23.74	19.96	<DL	<DL	<DL	<DL	<DL	<DL	60.42	<DL	NA	7.82	<DL	NA	6.58	<DL	<DL	NA	<DL	<DL	482.12	3.06	<DL
	SITE 7	INF	109.02	45.48	26.08	<DL	<DL	0.3	<DL	<DL	<DL	<DL	<DL	29.3	<DL	NA	14.96	<DL	NA	25	<DL	<DL	NA	<DL	<DL	<DL	4.54	<DL
		EFF	81.5	54.16	28.02	15.58	15.74	<DL	<DL	<DL	<DL	<DL	<DL	43.3	<DL	NA	13.48	<DL	NA	20.1	<DL	<DL	NA	<DL	<DL	1622.42	<DL	<DL
	SITE 8	INF	14.12	<DL	13.96	<DL	<DL	<DL	<DL	<DL	<DL	<DL	<DL	<DL	<DL	NA	<DL	<DL	NA	<DL	<DL	<DL	NA	<DL	<DL	185.18	<DL	<DL
		EFF	16.24	11.42	19.94	14.32	7.16	<DL	<DL	<DL	<DL	<DL	<DL	0.66	<DL	NA	<DL	<DL	NA	0.54	<DL	<DL	NA	<DL	<DL	300.84	<DL	<DL
	SITE 9	INF	28.8	21.06	14.7	24.36	2.6	<DL	<DL	<DL	<DL	<DL	<DL	<DL	<DL	NA	<DL	<DL	NA	2.1	<DL	<DL	NA	<DL	<DL	115.6	<DL	<DL
		EFF	52.5	49.8	32.38	10.42	5.78	<DL	<DL	<DL	<DL	<DL	<DL	9.02	<DL	NA	1.24	<DL	NA	23.74	<DL	<DL	NA	<DL	<DL	425.06	<DL	<DL
	SITE 11	INF	19.44	16.14	15.36	<DL	7.9	<DL	<DL	<DL	<DL	<DL	<DL	4.76	<DL	NA	4.56	<DL	NA	7.96	<DL	<DL	NA	<DL	<DL	656.92	<DL	<DL
		EFF	<DL	13.94	20.76	18.02	10.22	<DL	<DL	<DL	<DL	<DL	<DL	5.18	<DL	NA	3.04	<DL	NA	1.78	<DL	<DL	NA	<DL	<DL	860.4	<DL	<DL
fall	SITE 3	INF	27.6121	4.91879	47.8852	0.348322	17.4463	3.02416	5.04966	<DL	<DL	<DL	<DL	0.654362	0.922148	1.14765	36.3081	147.952	380.243	1383.35	0.708725	<DL	<DL	NA	<DL	195.624	<DL	<DL
		EFF	12.2437	7.99167	26.0417	1.34375	13.1021	2.47083	13.4104	0.289583	<DL	0.233333	0.408333	2.01875	0.127083	0.402083	8.73542	22.1583	69.8896	419.483	<DL	<DL	<DL	NA	<DL	158.981	<DL	<DL
	SITE 4	INF	42.942	8.708	8.288	0.814	3.996	0.726	6.916	<DL	<DL	<DL	0.622	1.026	<DL	0.186	0.61	<DL	3.154	2.178	<DL	<DL	<DL	NA	<DL	<DL	<DL	<DL
		EFF	16.551	14.9469	16.5571	1.30408	3.50816	1.46531	28.5571	0.138776	<DL	<DL	0.638776	8.56122	0.0530612	0.232653	0.481633	0.167347	0.52449	0.97551	<DL	<DL	<DL	NA	<DL	<DL	<DL	<DL
	SITE 5	INF	4.62715	<DL	1.87748	0.164901	0.886093	0.576159	9.33775	<DL	<DL	<DL	<DL	<DL	<DL	0.109272	0.186755	<DL	0.339735	0.542384	<DL	<DL	<DL	NA	<DL	<DL	<DL	<DL
		EFF	23.1452	8.29521	4.99315	0.65137	1.89452	3.85685	84.75	0.143836	<DL	<DL	0.117123	13.0993	<DL	0.0575342	0.0267123	<DL	0.489041	0.634932	<DL	<DL	<DL	NA	<DL	0.408904	<DL	<DL
	SITE 6	INF	25.3007	1.60855	1.40329	0.661184	4.06382	1.26316	20.5204	<DL	<DL	<DL	<DL	0.0157895	<DL	<DL	<DL	<DL	0.493421	0.819079	<DL	<DL	<DL	NA	<DL	<DL	0.665132	<DL
		EFF	7.73444	5.16556	3.99536	1.35497	19.0907	1.43046	32.5609	<DL	<DL	<DL	<DL	0.97947	<DL	0.089404	0.242384	<DL	0.429139	1.23576	<DL	<DL	<DL	NA	<DL	0.0794702	<DL	<DL
	SITE 7	INF	19.9422	3.04675	5.43506	2.77987	5.58506	1.24091	7.3461	0.0681818	<DL	<DL	<DL	1.80195	0.202597	1.73766	10.876	0.436364	4.46494	20.8539	0.120779	<DL	<DL	NA	<DL	<DL	<DL	<DL
		EFF	16.951	8.65448	4.61793	4.11931	6.02276	0.653793	9.97241	0.0310345	<DL	<DL	<DL	2.92759	0.233793	0.868966	5.07724	0.213103	1.32207	4.38414	<DL	<DL	<DL	NA	<DL	<DL	<DL	<DL
	SITE 8	INF	17.4636	<DL	1.77616	0.766887	6.65364	0.518543	3.05364	<DL	<DL	<DL	<DL	<DL	<DL	0.0556291	0.0596026	<DL	0.258278	0.486755	<DL	<DL	<DL	NA	<DL	<DL	<DL	<DL
		EFF	15.2833	1.48542	3.26042	0.4	1.775	3.02917	357.652	1.24792	<DL	0.920833	1.03333	0.127083	<DL	0.0583333	0.04375	<DL	0.495833	1.38542	<DL	<DL	<DL	NA	<DL	3.2125	<DL	<DL
	SITE 9	INF	NA	NA	NA	NA	NA	NA	NA	NA	NA	NA	NA	NA	NA	NA	NA	NA	NA	NA	NA	NA	NA	NA	NA	NA	NA	NA
		EFF	62.8678	11.7809	16.948	0.724342	7.56513	1.01447	10.9066	0.118421	<DL	<DL	1.83947	3.57632	0.0730263	0.254605	0.736184	0.209211	0.803289	2.01908	<DL	<DL	<DL	NA	<DL	<DL	<DL	<DL
	SITE 11	INF	32.0059	4.34118	2.24118	2.69216	5.86863	3.55098	68.7059	<DL	<DL	<DL	<DL	3.00784	<DL	0.619608	4.09216	0.14902	3.22941	6.81373	<DL	<DL	<DL	NA	<DL	0.129412	<DL	<DL
		EFF	20.3007	5.4457	12.2106	2.47351	3.6755	8.43377	158.68	0.248344	<DL	0.208609	0.516556	5.12185	0.433113	0.574172	1.96887	0.089404	0.325828	0.635762	0.109272	<DL	0.363576	NA	<DL	1.19603	<DL	<DL

## Sheet: Table S4
Table S4: All suspect, nontarget and target identifications grouped by homologous series. SS = identified by suspect screening, NTA = identified via Fluoromatch IM, T = target compound that was identified in samples; Chemicals characterized in standards and used in homologous series but not detected in any samples are labeled "Stnd Only"
Compounds that were available as standards and contributed to homologous series but were not detected in any samples are shaded gray.
For formulae where only one possible structure was found in PubChem, the SMILES for that structure is shown. If multiple similar structures were found, a representative SMILES is shown in gray text. If multiple diverse structures were listed, no SMILES is shown.
name	ID Method	adduct	neutral formula	m/z	RT	CCS (IM only)	Fluoromatch IM Score	Level before combining	Level after combining	SMILES
Perfluoroalkyl sulfonates
PFPrS	SS, T	[M-H]-	C3HF7O3S	248.945	6.689	125.08		1	1	C(C(F)(F)F)(C(F)(F)S(=O)(=O)O)(F)F
PFBS	SS, NTA, T	[M-H]-	C4HF9O3S	298.943	7.923	134.47	A	1	1	C(C(C(F)(F)S(=O)(=O)O)(F)F)(C(F)(F)F)(F)F
PFPeS	SS, T	[M-H]-	C5HF11O3S	348.938	9.307	142.05		1	1	C(C(C(F)(F)F)(F)F)(C(C(F)(F)S(=O)(=O)O)(F)F)(F)F
PFHxS	SS, NTA, T	[M-H]-	C6HF13O3S	398.936	10.405	152.02	C+	1	1	C(C(C(C(F)(F)S(=O)(=O)O)(F)F)(F)F)(C(C(F)(F)F)(F)F)(F)F
br-PFHxS	Stnd Only	[M-H]-	C6HF13O3S	398.935	10.206	148.54		1	1	NA (multiple structures)
PFHpS	SS, T	[M-H]-	C7HF15O3S	448.933	11.496	159.87		1	1	C(C(C(C(F)(F)F)(F)F)(F)F)(C(C(C(F)(F)S(=O)(=O)O)(F)F)(F)F)(F)F
L-PFOS	SS, NTA, T	[M-H]-	C8HF17O3S	498.93	12.319	170.07	A	1	1	C(C(C(C(C(F)(F)S(=O)(=O)O)(F)F)(F)F)(F)F)(C(C(C(F)(F)F)(F)F)(F)F)(F)F
br-PFOS	NTA, T	[M-H]-	C8HF17O3S	498.93	11.8, 12.0	163.36, 167.27	A	1b	1b	NA (multiple structures)
PFNS	Stnd Only	[M-H]-	C9HF19SO3	548.926	13.146	177.79		1	1	C(C(C(C(C(F)(F)F)(F)F)(F)F)(F)F)(C(C(C(C(F)(F)S(=O)(=O)O)(F)F)(F)F)(F)F)(F)F
PFDS	Stnd Only	[M-H]-	C10HF21O3S	598.922	13.814	187		1	1	C(C(C(C(C(C(F)(F)S(=O)(=O)O)(F)F)(F)F)(F)F)(F)F)(C(C(C(C(F)(F)F)(F)F)(F)F)(F)F)(F)F
PFUdS	Stnd Only	[M-H]-	C11HF23O3S	648.919	14.388	195.8		1	1	C(C(C(C(C(C(F)(F)F)(F)F)(F)F)(F)F)(F)F)(C(C(C(C(C(F)(F)S(=O)(=O)O)(F)F)(F)F)(F)F)(F)F)(F)F
PFDoS	Stnd Only	[M-H]-	C12HF25O3S	698.916	14.882	204.93		1	1	C(C(C(C(C(C(C(F)(F)S(=O)(=O)O)(F)F)(F)F)(F)F)(F)F)(F)F)(C(C(C(C(C(F)(F)F)(F)F)(F)F)(F)F)(F)F)(F)F
PFTrDS	Stnd Only	[M-H]-	C13HF27O3S	748.912	15.308	213.94		1	1	C(C(C(C(C(C(C(F)(F)F)(F)F)(F)F)(F)F)(F)F)(F)F)(C(C(C(C(C(C(F)(F)S(=O)(=O)O)(F)F)(F)F)(F)F)(F)F)(F)F)(F)F
Perfluoroalkyl carboxylates
PFPeA	SS, NTA, T	[M-H-CO2]-	C5HF9O2	218.987	7.688	117.9	A	1	1	OC(=O)C(F)(F)C(F)(F)C(F)(F)C(F)(F)F
PFHxA	SS, NTA, T	[M-H-CO2]-	C6HF11O2	268.982	9.102	125.74	A	1	1	OC(=O)C(F)(F)C(F)(F)C(F)(F)C(F)(F)C(F)(F)F
PFHpA	SS, NTA, T	[M-H-CO2]-	C7HF13O2	318.98	10.352	133.44	A	1	1	OC(=O)C(F)(F)C(F)(F)C(F)(F)C(F)(F)C(F)(F)C(F)(F)F
PFOA	Stnd Only	[M-H-CO2]-	C8HF15O2	368.975	11.475	139.49		1	1	OC(=O)C(F)(F)C(F)(F)C(F)(F)C(F)(F)C(F)(F)C(F)(F)C(F)(F)F
	Stnd Only	[M-H]-		412.965	11.487	156.17		1	1
PFNA	NTA, T	[M-H-CO2]-	C9HF17O2	418.974	12.341	148.34	A	1	1	OC(=O)C(F)(F)C(F)(F)C(F)(F)C(F)(F)C(F)(F)C(F)(F)C(F)(F)C(F)(F)F
	Stnd Only	[M-H]-		462.962	12.4	165.05		1	1
PFDA	NTA, T	[M-H-CO2]-	C10HF19O2	468.97	13.134	156.87	A	1	1	OC(=O)C(F)(F)C(F)(F)C(F)(F)C(F)(F)C(F)(F)C(F)(F)C(F)(F)C(F)(F)C(F)(F)F
	NTA, T	[M-H]-		512.96	13.136	175.57	A	1	1
PFUdA	NTA, T	[M-H-CO2]-	C11HF21O2	518.967	13.802	165.27	C+	1	1	OC(=O)C(F)(F)C(F)(F)C(F)(F)C(F)(F)C(F)(F)C(F)(F)C(F)(F)C(F)(F)C(F)(F)C(F)(F)F
	Stnd Only	[M-H]-		562.955	13.865	183.09		1	1
PFDoA	Stnd Only	[M-H-CO2]-	C12HF23O2	568.963	14.44	172.12		1	1	OC(=O)C(F)(F)C(F)(F)C(F)(F)C(F)(F)C(F)(F)C(F)(F)C(F)(F)C(F)(F)C(F)(F)C(F)(F)C(F)(F)F
	Stnd Only	[M-H]-		612.952	14.442	191.92		1	1
PFTrDA	Stnd Only	[M-H-CO2]-	C13HF25O2	618.959	14.938	180.46		1	1	OC(=O)C(F)(F)C(F)(F)C(F)(F)C(F)(F)C(F)(F)C(F)(F)C(F)(F)C(F)(F)C(F)(F)C(F)(F)C(F)(F)C(F)(F)F
	Stnd Only	[M-H]-		662.949	14.939	200.99		1	1
PFTeDA	Stnd Only	[M-H]-	C14HF27O2	712.946	15.366	209.86		1	1	OC(=O)C(F)(F)C(F)(F)C(F)(F)C(F)(F)C(F)(F)C(F)(F)C(F)(F)C(F)(F)C(F)(F)C(F)(F)C(F)(F)C(F)(F)C(F)(F)F
	Stnd Only	[M-H-CO2]-		668.956	15.361	188.62		1	1
PFHxDA	Stnd Only	[M-H-CO2]-	C16HF31O2	768.95	15.979	204.76		1	1	OC(=O)C(F)(F)C(F)(F)C(F)(F)C(F)(F)C(F)(F)C(F)(F)C(F)(F)C(F)(F)C(F)(F)C(F)(F)C(F)(F)C(F)(F)C(F)(F)C(F)(F)C(F)(F)F
	Stnd Only	[M-H]-		812.939	15.981	227.5		1	1
PFODA	Stnd Only	[M-H-CO2]-	C18HF35O2	868.943	16.367	220.35		1	1	OC(=O)C(F)(F)C(F)(F)C(F)(F)C(F)(F)C(F)(F)C(F)(F)C(F)(F)C(F)(F)C(F)(F)C(F)(F)C(F)(F)C(F)(F)C(F)(F)C(F)(F)C(F)(F)C(F)(F)C(F)(F)F
	Stnd Only	[M-H]-		912.933	16.377	243.81		1	1
Fluorotelomer sulfonates
4:2 FTS	SS, T	[M-H]-	C6H5F9O3S	326.973	9.05	150.33		1	1	OS(=O)(=O)CCC(F)(F)C(F)(F)C(F)(F)C(F)(F)F
6:2 FTS	SS, NTA, T	[M-H]-	C8H5F13O3S	426.967	11.392	169.84	D+	1	1	OS(=O)(=O)CCC(F)(F)C(F)(F)C(F)(F)C(F)(F)C(F)(F)C(F)(F)F
8:2 FTS	Stnd Only	[M-H]-	C10H5F17O3S	526.96	13.203	186.78		1	1	OS(=O)(=O)CCC(F)(F)C(F)(F)C(F)(F)C(F)(F)C(F)(F)C(F)(F)C(F)(F)C(F)(F)F
10:2 FTS	SS, T	[M-H]-	C12H5F21O3S	626.954	14.494	204.47		1	1	C(CS(=O)(=O)O)C(C(C(C(C(C(C(C(C(C(F)(F)F)(F)F)(F)F)(F)F)(F)F)(F)F)(F)F)(F)F)(F)F)(F)F
Polyfluoroalkyl phosphate diesters
1:2 diPAP	SS	[M-H]-	C6H9F6O4P	289.006	12.76	-		4	3d	O=P(O)(OCCC(F)(F)F)OCCC(F)(F)F
6:2 diPAP	Stnd Only	[M-H]-	C16H9F26O4P	788.974	15.132	232.48		1	1	OP(=O)(OCCC(F)(F)C(F)(F)C(F)(F)C(F)(F)C(F)(F)C(F)(F)F)OCCC(F)(F)C(F)(F)C(F)(F)C(F)(F)C(F)(F)C(F)(F)F
8:2 diPAP	SS, T	[M-H]-	C20H9F34O4P	988.961	16.105	261.89		1	1	OP(=O)(OCCC(F)(F)C(F)(F)C(F)(F)C(F)(F)C(F)(F)C(F)(F)C(F)(F)C(F)(F)F)OCCC(F)(F)C(F)(F)C(F)(F)C(F)(F)C(F)(F)C(F)(F)C(F)(F)C(F)(F)F
Polyfluoroalkyl phosphate esters
3:2 PAP	NTA	[M-H]-	C5H6F7O4P	292.983	10.619	136.28	D+	5	3d	C(COP(=O)(O)O)C(C(C(F)(F)F)(F)F)(F)F
5:2 PAP	NTA	[M-H]-	C7H6F11O4P	392.977	11.083	142.89	D+	5	3d	C(COP(=O)(O)O)C(C(C(C(C(F)(F)F)(F)F)(F)F)(F)F)(F)F
8:2 PAP	SS, T	[M-H]-	C10H6F17O4P	542.966	12.94	-		1	1	O=P(O)(O)OCCC(F)(F)C(F)(F)C(F)(F)C(F)(F)C(F)(F)C(F)(F)C(F)(F)C(F)(F)F
Single chemical (no series) with analytical standards
PFEtCHxS	SS, T	[M-H]-	C8HF15O3S	460.934	11.3	-		1	1	O=S(=O)(O)C1(C(F)(F)C(F)(F)F)C(F)(F)C(F)(F)C(F)(F)C(F)(F)C1(F)F
8:2 FTUCA	Stnd Only	[M-H]-	C10H2F16O2	456.972	12.666	172.38		1	1	OC(=O)C=C(F)C(F)(F)C(F)(F)C(F)(F)C(F)(F)C(F)(F)C(F)(F)C(F)(F)F
N-EtFOSAA	Stnd Only	[M-H]-	C12H8F17NO4S	583.981	13.893	197		1	1	CCN(CC(O)=O)S(=O)(=O)C(F)(F)C(F)(F)C(F)(F)C(F)(F)C(F)(F)C(F)(F)C(F)(F)C(F)(F)F
N-AmPr-FHxSA	Stnd Only	[M-H]-	C11H13F13N2O2S	483.04	11.905	183.2		1	1	CN(C)CCCNS(=O)(=O)C(F)(F)C(F)(F)C(F)(F)C(F)(F)C(F)(F)C(F)(F)F
PFEESA	Stnd Only	[M-H]-	C4HF9O4S	314.937	8.535	137.87		1	1	OS(=O)(=O)C(F)(F)C(F)(F)OC(F)(F)C(F)(F)F
Chlorinated perfluoroalkyl sulfonates
Cl-PFPrS	SS	[M-H]-	C3HClF6O3S	264.916	6.35	-		4	3d	C(C(F)(F)F)(C(F)(S(=O)(=O)O)Cl)(F)F
8Cl-PFOS	Stnd Only	[M-H]-	C8HClF16O3S	514.9	12.496	173.65		1	1	C(C(C(C(C(F)(F)Cl)(F)F)(F)F)(F)F)(C(C(C(F)(F)S(=O)(=O)O)(F)F)(F)F)(F)F
Chlorinated perfluoroether sulfonates
9Cl-PF3ONS	Stnd Only	[M-H]-	C8HClF16O4S	530.894	12.786	170.97		1	1	OS(=O)(=O)C(F)(F)C(F)(F)OC(F)(F)C(F)(F)C(F)(F)C(F)(F)C(F)(F)C(F)(F)Cl
11Cl-PF3OUdS	Stnd Only	[M-H]-	C10HClF20O4S	630.888	14.102	187.3		1	1	OS(=O)(=O)C(F)(F)C(F)(F)OC(F)(F)C(F)(F)C(F)(F)C(F)(F)C(F)(F)C(F)(F)C(F)(F)C(F)(F)Cl
Perfluoroalkyl sulfonamido acetic acids
FBSAA	NTA	[M-H]-	C6H4F9NO4S	355.967	5.931	158.9	C+	4	3d	OC(=O)CNS(=O)(=O)C(F)(F)C(F)(F)C(F)(F)C(F)(F)F
FOSAA	Stnd Only	[M-H]-	C10H4F17NO4S	555.949	13.084	182.86		1	1	OC(=O)CNS(=O)(=O)C(F)(F)C(F)(F)C(F)(F)C(F)(F)C(F)(F)C(F)(F)C(F)(F)C(F)(F)F
N-Methyl perfluoroalkyl sulfonamido acetic acids
N-MeFBSAA	SS	[M-H]-	C7H6F9NO4S	369.98	11.39	-		4	3d	CN(CC(=O)O)S(=O)(=O)C(F)(F)C(F)(F)C(F)(F)C(F)(F)F
L-N-MeFOSAA	Stnd Only	[M-H]-	C11H6F17NO4S	569.966	13.559	193.09		1	1	CN(CC(O)=O)S(=O)(=O)C(F)(F)C(F)(F)C(F)(F)C(F)(F)C(F)(F)C(F)(F)C(F)(F)C(F)(F)F
br-N-MeFOSAA	Stnd Only	[M-H]-	C11H6F17NO4S	569.966	13.319	191.13		1	1	NA (multiple structures)
Perfluoroalkyl sulfonamides
FBSA	Stnd Only	[M-H]-	C4H2F9NO2S	297.958	8.868	134.78		1	1	C(C(C(F)(F)S(=O)(=O)N)(F)F)(C(F)(F)F)(F)F
FPeSA	Stnd Only	[M-H]-	C5H2F11NO2S	347.955	10.693	143.46		1	1	C(C(C(F)(F)F)(F)F)(C(C(F)(F)S(=O)(=O)N)(F)F)(F)F
FHxSA	Stnd Only	[M-H]-	C6H2F13NO2S	397.951	11.986	152.13		1	1	C(C(C(C(F)(F)S(=O)(=O)N)(F)F)(F)F)(C(C(F)(F)F)(F)F)(F)F
FHpSA	Stnd Only	[M-H]-	C7H2F15NO2S	447.949	12.975	161.06		1	1	C(C(C(C(F)(F)F)(F)F)(F)F)(C(C(C(F)(F)S(=O)(=O)N)(F)F)(F)F)(F)F
FOSA	Stnd Only	[M-H]-	C8H2F17NO2S	497.945	13.779	169.95		1	1	C(C(C(C(C(F)(F)S(=O)(=O)N)(F)F)(F)F)(F)F)(C(C(C(F)(F)F)(F)F)(F)F)(F)F
FDSA	Stnd Only	[M-H]-	C10H2F21NO2S	597.939	15.056	188.09		1	1	C(C(C(C(C(C(F)(F)S(=O)(=O)N)(F)F)(F)F)(F)F)(F)F)(C(C(C(C(F)(F)F)(F)F)(F)F)(F)F)(F)F
N-Methyl perfluoroalkyl sulfonamides
MeFBSA	Stnd Only	[M-H]-	C5H4F9NO2S	311.973	11.349	138.79		1	1	CNS(=O)(=O)C(C(C(C(F)(F)F)(F)F)(F)F)(F)F
MeFOSA	Stnd Only	[M-H]-	C8H4F17NO2S	511.961	14.87	173.81		1	1	CNS(=O)(=O)C(C(C(C(C(C(C(C(F)(F)F)(F)F)(F)F)(F)F)(F)F)(F)F)(F)F)(F)F
Miscellaneous Confidence Level 4 Annotations
Perfluoropropyl-N-methyloxadiazolamine	SS	[M-H]-	C6H4F7N3O	266.016	5.24	-		4	4	CNc1nnc(C(F)(F)C(F)(F)C(F)(F)F)o1
Unsaturated PFHxA	SS	[M-H]-	C6HF9O2	274.976	5.17	-		4	4	C(=C(C(C(F)(F)F)(C(F)(F)F)F)F)(C(=O)O)F
C7H3F7N2O2	SS	[M-H]-	C7H3F7N2O2	279.001	6.51	-		4	4	NA (multiple potential structures)
C4HF9O2S	SS	[M-H]-	C4HF9O2S	282.948	8.27	-		4	4	C(C(C(F)(F)S(=O)O)(F)F)(C(F)(F)F)(F)F
C9H4F7N3	SS	[M-H]-	C9H4F7N3	286.023	6.43	-		4	4	C1=CC2=C(N=C1)N=CN2C(C(C(F)(F)F)(F)F)(F)F
C9H5F7N2O	SS	[M-H]-	C9H5F7N2O	289.024	7.23	-		4	4	NA (multiple potential structures)
C7H4F7N3O2	SS	[M-H]-	C7H4F7N3O2	294.01	10.14	-		4	4	CC1=C(C(=NN1)C(C(C(F)(F)F)(F)F)(F)F)[N+](=O)[O-]
C7H3F7N2OS	SS	[M-H]-	C7H3F7N2OS	294.978	11.3	-		4	4	NA (multiple potential structures)
C11H16F7NO	SS	[M-H]-	C11H16F7NO	310.105	6.79	-		4	4	NA (multiple potential structures)
C10H7F7N2O2	SS	[M-H]-	C10H7F7N2O2	319.034	6.45	-		4	4	NA (multiple potential structures)
4:2 FTThEtA	SS	[M-H]-	C8H7F9O2S	336.994	7.12	-		4	4	O=C(O)CSCCC(F)(F)C(F)(F)C(F)(F)C(F)(F)F
C10H6F7N3O3	SS	[M-H]-	C10H6F7N3O3	348.022	8.22	-		4	4	NA (multiple potential structures)
C11H12F7NO5	SS	[M-H]-	C11H12F7NO5	370.054	8.94	-		4	4	CCCOC(=O)[C@H](CC(=O)O)NC(=O)C(C(C(F)(F)F)(F)F)(F)F
C11H9F9N2O2	SS	[M-H]-	C11H9F9N2O2	371.046	12.27	-		4	4	CCOC(=O)C1=C(NN=C1C(C(C(C(F)(F)F)(F)F)(F)F)(F)F)C
C14H11F7N2O2	SS	[M-H]-	C14H11F7N2O2	371.065	6.07	-		4	4	NA (multiple potential structures)
C13H16F9NO4	SS	[M-H]-	C13H16F9NO4	420.088	8.08	-		4	4	NA (multiple potential structures)
C17H18F7N3O3	SS	[M-H]-	C17H18F7N3O3	444.116	11.23	-		4	4	NA (multiple potential structures)
Cl-PFNA	NTA	[M-H]-	C9HClF16O2	478.929	6.193	181.78	D-	4	4	C(=O)(C(C(C(C(C(C(C(C(F)(F)Cl)(F)F)(F)F)(F)F)(F)F)(F)F)(F)F)(F)F)O
Tris(2-methylpropyl) 3-(perfluorobutanamido)propane-1,1,3-tricarboxylate	SS	[M-H]-	C22H32F7NO7	554.2	12.92	-		4	4	CC(C)COC(=O)C(CC(C(=O)OCC(C)C)C(=O)OCC(C)C)NC(=O)C(F)(F)C(F)(F)C(F)(F)F
6:2 FTSO2PrAdDiMeEtS	SS	[M-H]-	C15H18F13NO6S2	618.028	11.81	-		4	4	CC(C)(CS(=O)(=O)O)NC(=O)CCS(=O)(=O)CCC(F)(F)C(F)(F)C(F)(F)C(F)(F)C(F)(F)C(F)(F)F
Features of Interest
114.926@4.961	NTA	NA	NA	114.926	4.961	107.17	C+	5	5	NA (multiple potential formulas)
177.013@5.716	NTA	NA	NA	177.013	5.716	122.74	D+	5	5	NA (multiple potential formulas)
191.0222@6.483	NTA	NA	NA	191.022	6.483	128.07	D+	5	5	NA (multiple potential formulas)
200.9532@5.35	NTA	NA	NA	200.953	5.35	128.42	D+	5	5	NA (multiple potential formulas)
200.9532@ 5.609	NTA	NA	NA	200.953	5.609	128.4	D+	5	5	NA (multiple potential formulas)
200.9532@ 6.71	NTA	NA	NA	200.953	6.71	128.44	D+	5	5	NA (multiple potential formulas)
210.9477@7.611	NTA	NA	NA	210.948	7.611	132.39	D+	5	5	NA (multiple potential formulas)
330.9801@10.6	NTA	NA	NA	330.98	10.6	134.02	D	5	5	NA (multiple potential formulas)
446.9677@13.14	NTA	NA	NA	446.968	13.14	157.47	D+	5	5	NA (multiple potential formulas)
560.9414@7.781	NTA	NA	NA	560.941	7.781	167.72	D+	5	5	NA (multiple potential formulas)
630.9611@14.039	NTA	NA	NA	630.961	14.039	179.17	D	5	5	NA (multiple potential formulas)
710.9312@10.547	NTA	NA	NA	710.931	10.547	188.33	D+	5	5	NA (multiple potential formulas)
760.9283@11.317	NTA	NA	NA	760.928	11.317	195.64	D+	5	5	NA (multiple potential formulas)
788.9435@11.977	NTA	NA	NA	788.943	11.977	199.65	D	5	5	NA (multiple potential formulas)

## Sheet: Table S5
Table S5: Concentrations (ng/L) for all compounds across grab samples
	Influent (N=16)				Effluent (N=17)
	Median	Minimum	Maximum	DF (%)	Median	Minimum	Maximum	DF (%)
PFBA	28.95	5	8449.3	1	20.3007	ND	1771.12	0.941176
PFPeA	2.5	ND	89.26	0.625	14.9469	ND	89.2	0.941176
PFHxA	13.46	ND	78.36	0.9375	20.76	1.94532	96.44	1
PFHpA	0.5	ND	155.82	0.6875	25	0.5	25	1
PFOA	6.93485	ND	65.2	0.8125	6.93485	6.93485	46.42	1
PFNA	0.5	ND	8.82	0.5625	0.5	ND	8.54	0.529412
PFDA	ND	ND	68.7059	0.4375	ND	ND	357.652	0.529412
PFUdA	ND	ND	0.5	0.0625	ND	ND	1.24792	0.411765
PFDoA	ND	ND	ND	0	ND	ND	ND	0
PFTrDA	ND	ND	ND	0	ND	ND	0.5	0.176471
PFTeDA	ND	ND	1	0.0625	ND	ND	1	0.352941
PFBS	0.44	ND	845.14	0.5625	5.18	0.44	172.52	1
PFPeS	ND	ND	0.47	0.125	ND	ND	0.47	0.294118
br-PFHxS*	0.43	ND	1.73766	-	0.43	0.43	0.43	-
L-PFHxS	0.37	ND	134.86	0.6875	1.96887	ND	13.7	0.941176
PFHpS	ND	ND	147.952	0.1875	ND	ND	22.1583	0.294118
br-PFOS*	3.154	0.98	380.243	-	0.98	0.98	69.8896	-
PFOS	2.139	ND	1383.35	0.75	2.01908	0.37	419.483	1
PFNS	ND	ND	0.48	0.0625	ND	ND	0.48	0.117647
PFDS	ND	ND	ND	0	ND	ND	ND	0
PFUdS	ND	ND	ND	0	ND	ND	0.5	0.0588235
PFDoS	ND	ND	ND	0	ND	ND	ND	0
4:2 FTS	ND	ND	ND	0	ND	ND	ND	0
6:2 FTS	58.275	ND	3631.54	0.5625	158.981	ND	1622.42	0.764706
8:2 FTS	ND	ND	59.34	0.125	ND	ND	18.38	0.0588235
10:2 FTS	ND	ND	ND	0	ND	ND	ND	0
*detection frequencies were not calculated for branched isomers as they were not differentiated in the June sample quantitation

## Sheet: Table S6
Table S6: Concentrations of detected PFASs in mPEs (ng/sampler). Light gray fill represents concentrations <LOQ. Dark gray fill represents concentrations <DL. "<" Denotes compound with censor rate >50%.
	mPEs						AVERAGE GRAB CONCENTRATION (ng/L)
	WEEK 2		WEEK 4		WEEK 6
	INF	EFF	INF	EFF	INF	EFF	INF	EFF
PFBA	0.1	0.12	0.11	0.16	0.01	0.01	17.4	11.1
PFPeA	<DL	<DL	<DL	<DL	<DL	<DL	3	11.2
PFHxA	0.04	0.2	0.41	0.16	0.04	0.14	53.8	90.3
PFHpA	0.01	0.06	0.01	0.06	0.01	0.03	<DL	<DL
PFOA	0.03	0.16	0.02	0.26	0.02	0.14	9.1	18.1
PFNA	0.01	0.05	0.01	0.1	0.01	0.06	<DL	<DL
PFDA	0.07	0.07	0.07	0.49	0.07	0.26	<DL	<DL
L-PFBS	0.01	0.08	0.01	0.14	0.03	0.16	<DL	<DL
L-PFPeS	<DL	<DL	<DL	<DL	<DL	<DL	<DL	<DL
br-PFHxS	0.38	0.38	0.38	1.92	0.38	1	1.4	1
L-PFHxS	0.01	0.01	0.01	0.02	0.01	0.01	41.3	22.1
L-PFHpS	0.01	0.02	0.01	0.03	0.02	0.02	264.5	68.6
br-PFOS	0.38	0.38	0.38	0.38	0.38	0.38	490	189.7
L-PFOS	0.38	0.47	0.09	0.88	0.43	0.46	1204.6	759.1
PFNS	<DL	<DL	<DL	<DL	<DL	<DL	3.4	0.5
PFDS	<DL	<DL	<DL	<DL	<DL	<DL	<DL	<DL
4:2 FTS	<DL	<DL	<DL	<DL	<DL	<DL	<DL	<DL
6:2 FTS	0.01	0.04	0.03	0.05	0.36	0.3	97.3	140.5

## Sheet: Table S7
Table S7: Tentative PFAS identifications via suspect screening detected in all 3 influent and/or effluent replicate injections
Features are assigned chemical structures based on the suspect screening list but other structures are possible for Level 4 identifications
				Peak Area (Avg ± RSD)						Area Ratio	Perfluorinated
Name	CAS Number	Level	Formula	Influent (n = 3 replicates)			Effluent (n = 3 replicates)			(EFF/INF)	Chain-length	SMILES for suggested structure
Influent only
Perfluorohexenoic acid (UPFHxA)	239795-58-5	4	C6HF9O2	69799	±	0.25		-		NA	5	C(=C(C(C(F)(F)F)(C(F)(F)F)F)F)(C(=O)O)F
5-(Perfluoropropyl)-N-methyl-1,3,4-oxadiazol-2-amine	714975-29-8	4	C6H4F7N3O	176033	±	0.3		-		NA	3	CNc1nnc(C(F)(F)C(F)(F)C(F)(F)F)o1
3-(Perfluoropropyl)-5-methyl-4-nitro-1H-pyrazole	82633-69-0	4	C7H4F7N3O2	327517	±	0.26		-		NA	3	CC1=C(C(=NN1)C(C(C(F)(F)F)(F)F)(F)F)[N+](=O)[O-]
6-(Perfluoropropanyl)-1H-benzotriazole	1433216-34-2	4	C9H4F7N3	403855	±	0.32		-		NA	3	C1=CC2=NNN=C2C=C1C(C(F)(F)F)(C(F)(F)F)F
N-2-Pyridinylperfluorobutanamide	283172-09-8	4	C9H5F7N2O	472712	±	0.42		-		NA	3	C1=CC=NC(=C1)NC(=O)C(C(C(F)(F)F)(F)F)(F)F
Perfluorobutanamide, N-(4-amino-2-hydroxyphenyl)	847-51-8	4	C10H7F7N2O2	184067	±	0.42		-		NA	3	C1=CC(=C(C=C1N)O)NC(=O)C(C(C(F)(F)F)(F)F)(F)F
Ethyl 3-methyl-5-(perfluorobutyl)-1H-pyrazole-4-carboxylate	119403-58-6	4	C11H9F9N2O2	18772	±	0.32		-		NA	4	CCOC(=O)C1=C(NN=C1C(C(C(C(F)(F)F)(F)F)(F)F)(F)F)C
Ethyl 3-[(2-ethoxy-2-oxoethyl)amino]-nonafluoroheptanoate	132114-64-8	4	C13H16F9NO4	71412	±	0.32		-		NA	4	CCOC(=O)CC(C(C(C(C(F)(F)F)(F)F)(F)F)(F)F)NCC(=O)OCC
N'-[(2Z)-Perfluoropropyl-4-oxobut-2-en-2-yl]benzohydrazide	203200-76-4	4	C14H11F7N2O2	38568	±	0.25		-		NA	3	C/C(=C/C(=O)C(C(C(F)(F)F)(F)F)(F)F)/NNC(=O)C1=CC=CC=C1
N'-(6,7-Dimethoxy-3,3-dimethyl-3,4-dihydroisoquinolinyl)-perfluorobutanehydrazide	304435-61-8	4	C17H18F7N3O3	208034	±	0.266391		-		NA	3	CC1(CC2=CC(=C(C=C2C(=N1)NNC(=O)C(C(C(F)(F)F)(F)F)(F)F)OC)OC)C
Influent > Effluent
Chlorinated perfluoropropane sulfonic acid (Cl-PFPrS)	752170-49-3	4	C3HClF6O3S	81026	±	0.36	15554	±	0.07	0.2	3	C(C(F)(F)F)(C(F)(S(=O)(=O)O)Cl)(F)F
1:2 fluorotelomer phosphate diester (1:2 diPAP)	83280-91-5	3d	C6H9F6O4P	59004	±	0.36	27801	±	0.12	0.5	1	O=P(O)(OCCC(F)(F)F)OCCC(F)(F)F
6-(Perfluoropropyl)-2-sulfanylidene-2,3-dihydropyrimidin-4(1H)-one	145663-11-2	4	C7H3F7N2OS	32720	±	0.17	7078	±	0.11	0.2	3	C1=C(C(=O)NC(=S)N1)C(C(C(F)(F)F)(F)F)(F)F
N-heptan-2-yl perfluorobutanamide	61578-74-3	4	C11H16F7NO	728840	±	0.39	448045	±	0.26	0.6	3	CCCCCC(C)NC(=O)C(C(C(F)(F)F)(F)F)(F)F
Effluent only
5-(Perfluoropropanyl)pyrimidine-2,4(1H,3H)-dione	80384-59-4	4	C7H3F7N2O2		-		75458	±	0.35	NA	3	C1=C(C(=O)NC(=O)N1)C(C(F)(F)F)(C(F)(F)F)F
N-methyl perfluorobutane sulfonamido acetic acid (N-MeFBSAA)	159381-10-9	4	C7H6F9NO4S		-		23347	±	0.17	NA	4	CN(CC(=O)O)S(=O)(=O)C(F)(F)C(F)(F)C(F)(F)C(F)(F)F
4:2 fluorotelomer thio acetic acid (4:2 FTSEA)	123708-08-7	4	C8H7F9O2S		-		115188	±	0.37	NA	4	O=C(O)CSCCC(F)(F)C(F)(F)C(F)(F)C(F)(F)F
8:2 polyfluoroalkyl phosphate ester (8:2 PAP)	57678-03-2	4	C10H6F17O4P		-		428901	±	0.23	NA	8	O=P(O)(O)OCCC(F)(F)C(F)(F)C(F)(F)C(F)(F)C(F)(F)C(F)(F)C(F)(F)C(F)(F)F
Nifluridide	61444-62-0	4	C10H6F7N3O3		-		30345	±	0.12	NA	1; 2	C1=C(C=C(C(=C1NC(=O)C(C(F)F)(F)F)N)[N+](=O)[O-])C(F)(F)F
Effluent > Influent
Perfluorobutyl sulfinate (PFBSi)	34642-43-8	4	C4HF9O2S	7320	±	0.378751	20759.7	±	0.217628	2.83602	4	C(C(C(F)(F)S(=O)O)(F)F)(C(F)(F)F)(F)F
N-(Perfluoro-1-oxobutyl)aspartic acid 1-propyl ester	88436-09-3	4	C11H12F7NO5	164802	±	0.39	498508	±	0.11	3.02489	3	CCCOC(=O)[C@H](CC(=O)O)NC(=O)C(C(C(F)(F)F)(F)F)(F)F
6:2 fluorotelomer sulfonyl propano-amido alkyl sulfonic acid (6:2 FTSO2AoS)	1911606-13-7	4	C15H18F13NO6S2	12489	±	0.43	20616	±	0.17	1.7	6	CC(C)(CS(=O)(=O)O)NC(=O)CCS(=O)(=O)CCC(F)(F)C(F)(F)C(F)(F)C(F)(F)C(F)(F)C(F)(F)F
Tris(2-methylpropyl) 3-(perfluorobutanamido)propane-1,1,3-tricarboxylate	95654-14-1	4	C22H32F7NO7	34568	±	0.21	72468	±	0.14	2.1	3	CC(C)COC(=O)C(CC(C(=O)OCC(C)C)C(=O)OCC(C)C)NC(=O)C(F)(F)C(F)(F)C(F)(F)F

## Sheet: Table S8
Table S8: FluoroMatch Results (with target analytes removed)
						Peak Area (Avg ± RSD)
Score (FM)	Score48	m/z	RT (min)	CCS (Å2)	Assigned Formula (FM)	Influent (n = 3 replicates)			Effluent (n = 3 replicates)
C+	5	114.926	4.961	107.17	NA	29237	±	0.16		-
D+	5	177.013	5.716	122.74	NA	116541	±	0.39		-
D+	5	191.022	6.483	128.07	NA	92795	±	0.59		-
D+	5	200.953	6.711	128.44	NA	161954	±	0.74		-
D+	5	200.953	5.346	128.42	NA	197061	±	0.25		-
D+	5	200.953	5.609	128.4	NA	241880	±	0.8		-
D+	5	210.948	7.611	132.39	NA	119828	±	0.46		-
D+	5	292.983	10.62	136.28	NA	109602	±	0.23		-								19
D	5	330.98	10.6	134.02	NA		-		50687	±	0.28
C+	4	355.967	5.931	158.9	C6H4F9NO4S		-		96087	±	0.31
D+	5	392.977	11.08	142.89	NA		-		115213	±	0.08
D+	5	446.968	13.14	157.47	NA		-		353747	±	0.36
D-	4	478.929	6.193	181.78	C9HClF16O2		-		124116	±	0.3
D+	5	560.941	7.781	167.72	NA		-		77131	±	0.18
D	5	630.961	14.04	179.17	NA		-		55807	±	0.15
D+	5	710.931	10.55	188.33	NA	124759	±	0.28	212549	±	0.13
D+	5	760.928	11.32	195.64	NA		-		190303	±	0.23
D	5	788.943	11.98	199.65	NA	971534	±	0.11		-
